# Supplementary material for: Employing tripodal carboxylate ligand to construct Co(ii) coordination networks modulated by N-donor ligands: syntheses, structures and magnetic properties
Source: Royal Society of Chemistry journal article supplement (doi:10.1039/c3dt51241j), 2013-01-01
Supplement: c3dt51241j.pdf [file c3dt51241j.pdf]

# Employing tripodal carboxylate ligand to construct Co(II) coordination networks modulated by N-donor ligands: syntheses, structures and magnetic properties

Xue-Zhi Song,<sup>†,‡</sup> Shu-Yan Song,<sup>†</sup> Min Zhu,<sup>†,‡</sup> Zhao-Min Hao,<sup>†,‡</sup> Xing Meng,<sup>†,‡</sup> Shu-Na Zhao,<sup>†,‡</sup>  
Hong-Jie Zhang<sup>\*,†</sup>

<sup>†</sup>State Key Laboratory of Rare Earth Resource Utilization, Changchun Institute of Applied Chemistry, Chinese Academy of Sciences, 5625 Renmin Street, Changchun 130022, China

<sup>‡</sup>University of Chinese Academy of Sciences, Beijing, 100049, China

**Fig. S1-S3:** ORTEP drawing of the asymmetrical units in compounds **4-6**.

**Fig. S4:** Simulated (red) and experimental as-synthesized (black) powder X-ray diffraction (PXRD) patterns of compounds **1-6**.

**Fig. S5:** The FT-IR spectrum of compounds **1-6**.

**Fig. S6:** TGA curve of compounds **1-6**.

**Table S1:** Selected bond lengths (Å) and angles (deg) for compounds **1-6**.

**Table S2:** Hydrogen bonds (lengths and angles, Å and deg) for compounds **1-6**.

**Table S3:** The C<sub>phenyl</sub>-O-C<sub>phenyl</sub> bond angles and the dihedral angles between the phenyl rings in H<sub>3</sub>cpia ligand.

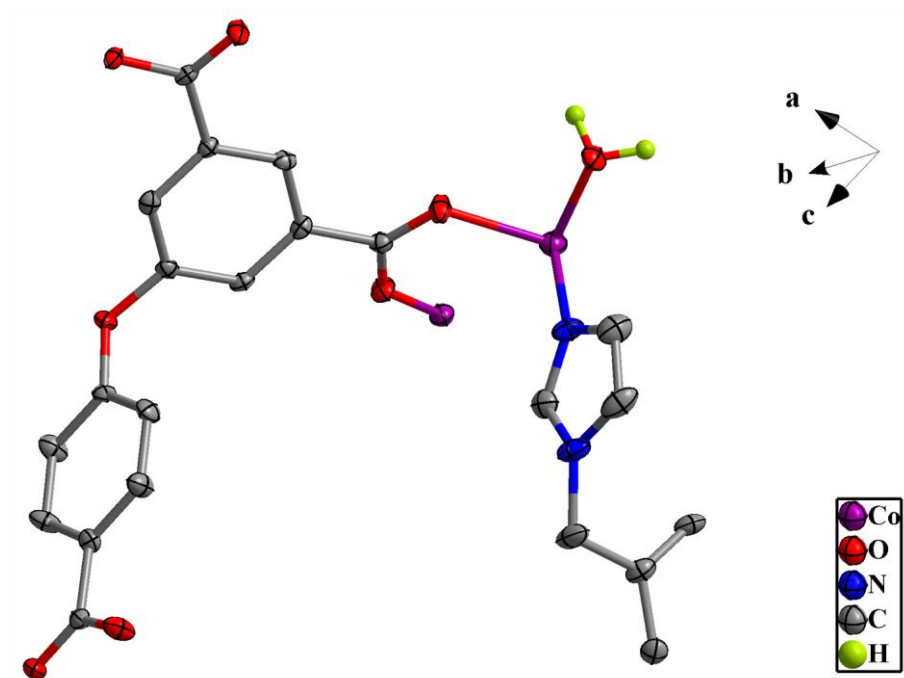

**Fig. S1** ORTEP drawing of the asymmetrical unit in **4** (50% probability ellipsoids).  
Hydrogen atoms attached to carbon atoms are omitted for clarity.

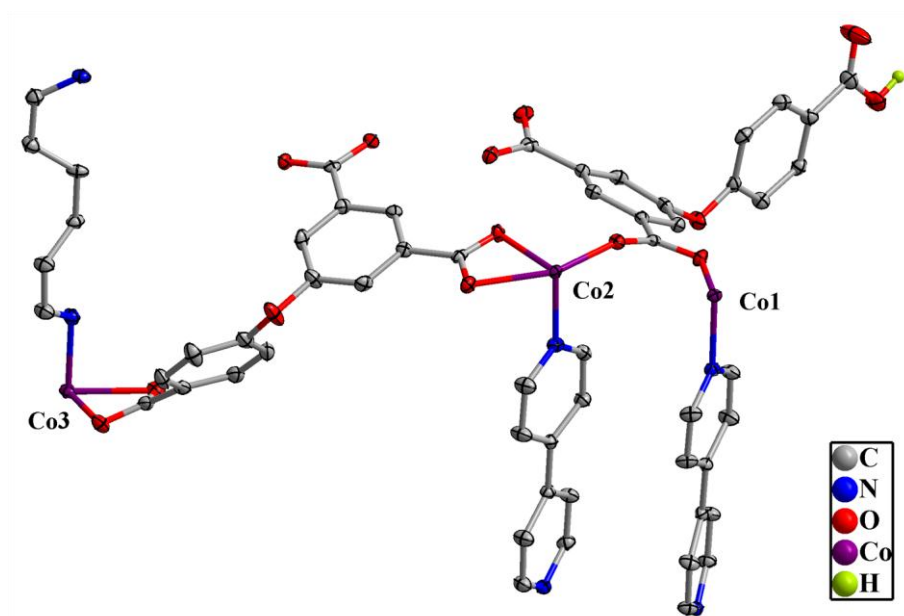

**Fig. S2** ORTEP drawing of the asymmetrical unit in **5** (50% probability ellipsoids).  
Hydrogen atoms attached to carbon atoms are omitted for clarity.

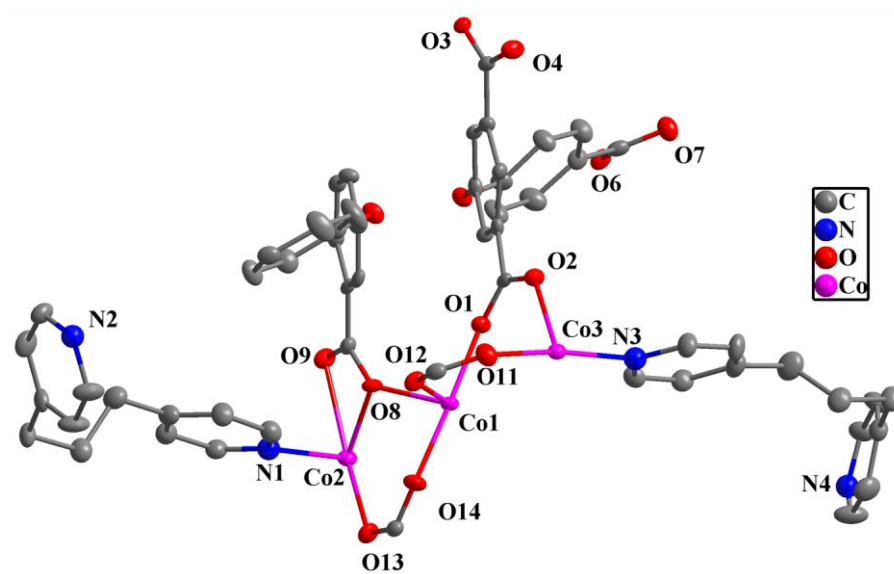

**Fig. S3** ORTEP drawing of the asymmetrical unit in **6** (50% probability ellipsoids).

Hydrogen atoms attached to carbon atoms are omitted for clarity.

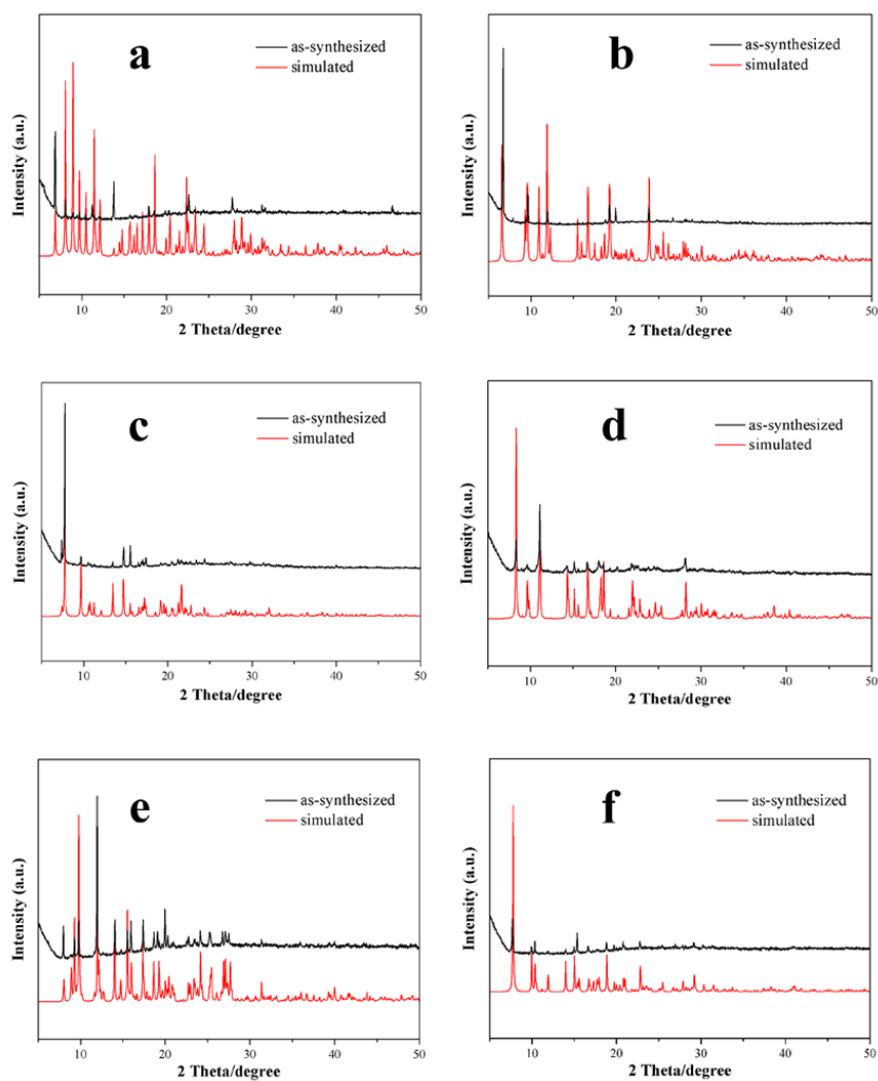

**Fig. S4** Simulated (red) and experimental as-synthesized (black) powder X-ray diffraction (PXRD) patterns of **1**(a), **2**(b), **3**(c), **4**(d), **5**(e) and **6**(f).

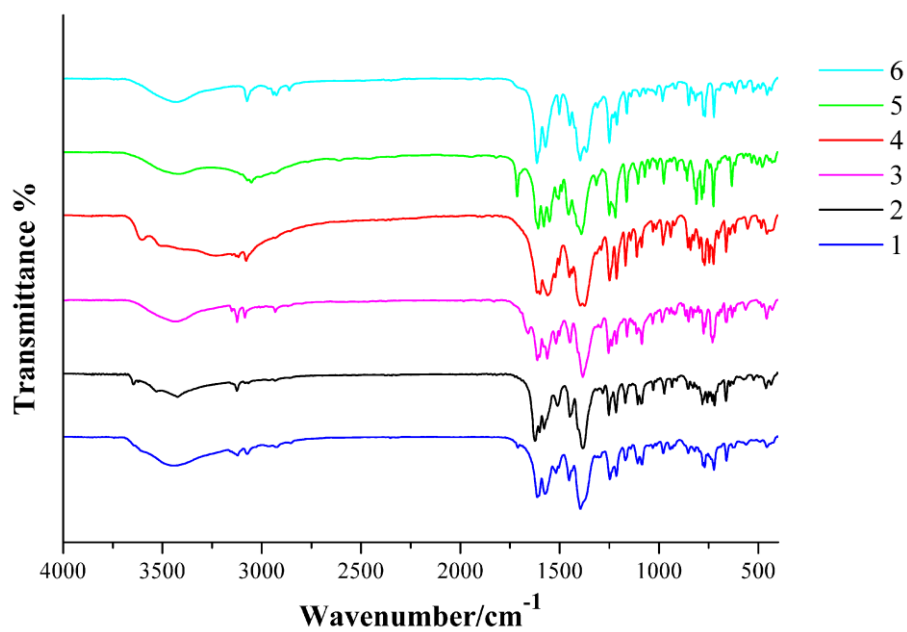

**Fig. S5** The FT-IR spectrum of compounds **1-6**.

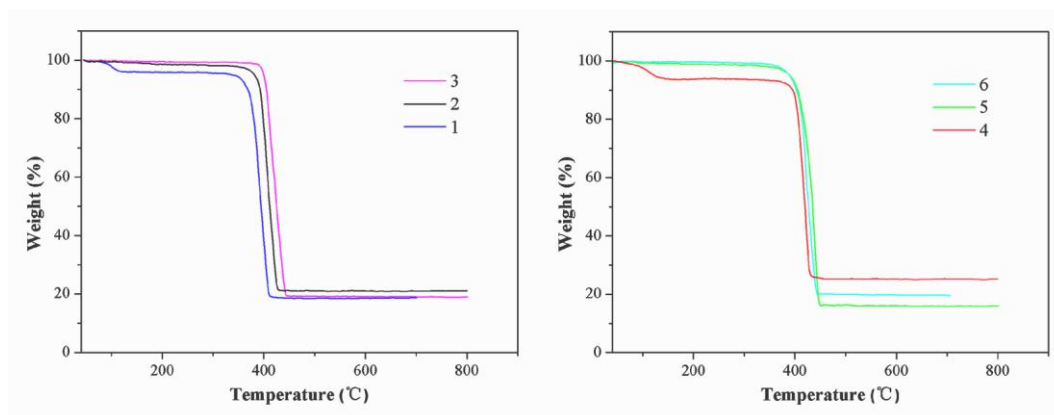

**Fig. S6:** TGA curve of compounds **1-6**.

**Table S1:** Selected bond lengths (Å) and angles (deg) for compounds **1-6**.

| Compound 1          |            |                     |            |
|---------------------|------------|---------------------|------------|
| Co(1)-O(2)          | 2.141(3)   | Co(2)-N(1)          | 2.167(3)   |
| Co(1)-O(4)#4        | 2.019(3)   | Co(2)-O(1)          | 2.368(3)   |
| Co(1)-O(4)#5        | 2.019(3)   | Co(2)-O(2)          | 2.113(3)   |
| Co(1)-O(6)#6        | 2.062(3)   | Co(2)-O(7)#7        | 2.073(3)   |
| Co(1)-O(6)#7        | 2.062(3)   | Co(2)-N(3)#9        | 2.085(3)   |
| Co(1)-O(2)#8        | 2.141(3)   | Co(2)-O(3)#5        | 2.093(3)   |
| O(4)#4-Co(1)-O(4)#5 | 180.00(14) | O(6)#6-Co(1)-O(2)#8 | 93.23(10)  |
| O(4)#4-Co(1)-O(6)#6 | 94.04(11)  | O(6)#7-Co(1)-O(2)#8 | 86.77(10)  |
| O(4)#5-Co(1)-O(6)#6 | 85.96(11)  | O(4)#4-Co(1)-O(2)   | 94.98(10)  |
| O(4)#4-Co(1)-O(6)#7 | 85.96(11)  | O(4)#5-Co(1)-O(2)   | 85.02(10)  |
| O(4)#5-Co(1)-O(6)#7 | 94.04(11)  | O(6)#6-Co(1)-O(2)   | 86.77(10)  |
| O(6)#6-Co(1)-O(6)#7 | 180.00(16) | O(6)#7-Co(1)-O(2)   | 93.23(10)  |
| O(4)#4-Co(1)-O(2)#8 | 85.02(10)  | O(2)#8-Co(1)-O(2)   | 180.000(1) |
| O(4)#5-Co(1)-O(2)#8 | 94.98(10)  | N(3)#9-Co(2)-N(1)   | 99.64(13)  |
| O(7)#7-Co(2)-N(3)#9 | 85.75(12)  | O(3)#5-Co(2)-N(1)   | 84.15(12)  |
| O(7)#7-Co(2)-O(3)#5 | 93.24(12)  | O(2)-Co(2)-N(1)     | 86.66(11)  |
| N(3)#9-Co(2)-O(3)#5 | 97.08(12)  | O(7)#7-Co(2)-O(1)   | 87.45(11)  |
| O(7)#7-Co(2)-O(2)   | 89.43(11)  | N(3)#9-Co(2)-O(1)   | 94.91(11)  |
| N(3)#9-Co(2)-O(2)   | 152.91(12) | O(3)#5-Co(2)-O(1)   | 168.01(11) |
| O(3)#5-Co(2)-O(2)   | 109.81(11) | O(2)-Co(2)-O(1)     | 58.21(10)  |
| O(7)#7-Co(2)-N(1)   | 174.25(12) | N(1)-Co(2)-O(1)     | 94.04(11)  |
| Compound 2          |            |                     |            |
| Co(1)-N(1)          | 2.170(2)   | Co(2)-O(1)          | 2.1155(16) |
| Co(1)-O(2)          | 2.0528(16) | Co(2)-O(6)          | 2.0269(17) |
| Co(1)-O(5)          | 2.1651(18) | Co(2)-O(8)          | 1.9931(16) |
| Co(1)-O(8)          | 2.0890(16) | Co(2)-O(3)#3        | 1.9946(16) |
| Co(1)-O(4)#6        | 2.0345(16) | Co(2)-O(8)#5        | 2.1451(16) |
| Co(1)-N(3)#2        | 2.141(2)   | O(5)-Co(1)-N(1)     | 86.91(7)   |
| O(4)#6-Co(1)-O(2)   | 171.41(7)  | O(2)-Co(1)-O(5)     | 88.24(7)   |
| O(4)#6-Co(1)-O(8)   | 94.16(6)   | O(8)-Co(1)-O(5)     | 93.89(7)   |
| O(2)-Co(1)-O(8)     | 94.30(7)   | N(3)#2-Co(1)-O(5)   | 174.08(7)  |
| O(4)#6-Co(1)-N(3)#2 | 94.50(8)   | O(4)#6-Co(1)-N(1)   | 84.85(7)   |
| O(2)-Co(1)-N(3)#2   | 86.99(8)   | O(2)-Co(1)-N(1)     | 86.71(7)   |
| O(8)-Co(1)-N(3)#2   | 90.00(7)   | O(8)-Co(1)-N(1)     | 178.73(7)  |
| O(4)#6-Co(1)-O(5)   | 89.68(7)   | N(3)#2-Co(1)-N(1)   | 89.27(8)   |
| O(8)-Co(2)-O(3)#3   | 134.27(7)  | O(8)-Co(2)-O(6)     | 117.23(7)  |
| O(3)#3-Co(2)-O(6)   | 108.48(7)  | O(8)-Co(2)-O(8)#5   | 79.99(7)   |
| O(8)-Co(2)-O(1)     | 97.86(7)   | O(3)#3-Co(2)-O(8)#5 | 98.11(6)   |
| O(3)#3-Co(2)-O(1)   | 83.51(6)   | O(6)-Co(2)-O(8)#5   | 91.48(7)   |
| O(6)-Co(2)-O(1)     | 89.35(7)   | O(1)-Co(2)-O(8)#5   | 177.84(6)  |
| Compound 3          |            |                     |            |
| Co(1)-O(1)          | 2.087(4)   | Co(2)-O(2)          | 2.057(4)   |

---

|                     |            |                     |            |
|---------------------|------------|---------------------|------------|
| Co(1)-O(3)          | 2.116(4)   | Co(2)-O(3)          | 2.105(4)   |
| Co(1)-O(6)#4        | 2.048(4)   | Co(2)-O(5)#4        | 2.051(4)   |
| Co(1)-O(6)#5        | 2.048(4)   | Co(2)-N(3)#3        | 2.129(6)   |
| Co(1)-O(1)#6        | 2.087(4)   | Co(2)-N(1)          | 2.079(6)   |
| Co(1)-O(3)#6        | 2.116(4)   | O(3)-Co(1)-O(3)#6   | 180.000(1) |
| O(6)#4-Co(1)-O(6)#5 | 180.0      | O(6)#4-Co(1)-O(1)   | 95.17(17)  |
| O(6)#5-Co(1)-O(1)   | 84.83(17)  | O(6)#5-Co(1)-O(1)#6 | 95.17(17)  |
| O(6)#4-Co(1)-O(1)#6 | 84.83(17)  | O(1)-Co(1)-O(1)#6   | 180.0      |
| O(6)#4-Co(1)-O(3)   | 89.98(17)  | O(6)#5-Co(1)-O(3)   | 90.02(17)  |
| O(1)-Co(1)-O(3)     | 85.27(16)  | O(1)#6-Co(1)-O(3)   | 94.73(16)  |
| O(6)#4-Co(1)-O(3)#6 | 90.02(17)  | O(6)#5-Co(1)-O(3)#6 | 89.98(17)  |
| O(1)-Co(1)-O(3)#6   | 94.73(16)  | O(1)#6-Co(1)-O(3)#6 | 85.27(16)  |
| O(5)#4-Co(2)-O(2)   | 94.94(17)  | O(5)#4-Co(2)-N(1)   | 89.6(2)    |
| O(2)-Co(2)-N(1)     | 89.0(2)    | O(5)#4-Co(2)-O(3)   | 105.39(17) |
| O(2)-Co(2)-O(3)     | 89.97(18)  | N(1)-Co(2)-O(3)     | 164.95(19) |
| O(5)#4-Co(2)-N(3)#3 | 95.47(19)  | O(2)-Co(2)-N(3)#3   | 168.8(2)   |
| N(1)-Co(2)-N(3)#3   | 95.2(2)    | O(3)-Co(2)-N(3)#3   | 83.33(19)  |
| Compound 4          |            |                     |            |
| Co(1)-O(2)#1        | 2.035(3)   | Co(2)-O(6)#2        | 1.994(3)   |
| Co(1)-O(2)          | 2.035(3)   | Co(2)-N(1)          | 2.083(3)   |
| Co(1)-O(7)#2        | 2.080(3)   | Co(2)-O(1)          | 2.088(3)   |
| Co(1)-O(7)#3        | 2.080(3)   | Co(2)-O(1W)         | 2.104(3)   |
| Co(1)-O(3)#4        | 2.128(2)   | Co(2)-O(3)#4        | 2.117(3)   |
| Co(1)-O(3)#5        | 2.128(2)   | O(2)-Co(1)-O(3)#4   | 88.14(11)  |
| O(2)#1-Co(1)-O(2)   | 180.00(17) | O(7)#2-Co(1)-O(3)#4 | 91.14(10)  |
| O(2)#1-Co(1)-O(7)#2 | 83.58(11)  | O(7)#3-Co(1)-O(3)#4 | 88.86(10)  |
| O(2)-Co(1)-O(7)#2   | 96.42(11)  | O(2)#1-Co(1)-O(3)#5 | 88.14(11)  |
| O(2)#1-Co(1)-O(7)#3 | 96.42(11)  | O(2)-Co(1)-O(3)#5   | 91.86(11)  |
| O(2)-Co(1)-O(7)#3   | 83.58(11)  | O(7)#2-Co(1)-O(3)#5 | 88.86(10)  |
| O(7)#2-Co(1)-O(7)#3 | 180.000(1) | O(7)#3-Co(1)-O(3)#5 | 91.14(10)  |
| O(2)#1-Co(1)-O(3)#4 | 91.86(11)  | O(3)#4-Co(1)-O(3)#5 | 180.0      |
| O(6)#2-Co(2)-N(1)   | 168.59(14) | O(6)#2-Co(2)-O(3)#4 | 93.59(11)  |
| O(6)#2-Co(2)-O(1)   | 94.13(13)  | N(1)-Co(2)-O(3)#4   | 87.55(12)  |
| N(1)-Co(2)-O(1)     | 96.20(14)  | O(1)-Co(2)-O(3)#4   | 109.29(11) |
| O(6)#2-Co(2)-O(1W)  | 86.66(11)  | O(1W)-Co(2)-O(3)#4  | 165.01(11) |
| N(1)-Co(2)-O(1W)    | 89.32(13)  | O(1)-Co(2)-O(1W)    | 85.62(11)  |
| Compound 5          |            |                     |            |
| Co(1)-N(3)          | 2.154(2)   | Co(2)-O(8)          | 2.2434(17) |
| Co(1)-O(1)          | 2.0492(16) | Co(2)-O(9)          | 2.1474(17) |
| Co(1)-O(11)#5       | 2.0299(17) | Co(2)-N(1)          | 2.139(2)   |
| Co(1)-O(3)#5        | 2.1143(17) | Co(2)-O(2)          | 2.0444(17) |
| Co(1)-N(4)#3        | 2.132(2)   | Co(2)-O(10)#5       | 2.0530(16) |
| Co(1)-O(4)#5        | 2.3968(19) | Co(2)-N(2)#3        | 2.145(2)   |
| Co(3)-N(5)          | 2.203(3)   | Co(3)-O(13)#1       | 2.0648(17) |

---



---

|                      |            |                       |            |
|----------------------|------------|-----------------------|------------|
| Co(3)-O(13)          | 2.0648(17) | Co(3)-N(6)#2          | 2.100(3)   |
| Co(3)-O(14)          | 2.2192(18) | Co(3)-O(14)#1         | 2.2192(18) |
| O(11)#5-Co(1)-O(1)   | 121.90(7)  | O(11)#5-Co(1)-O(4)#5  | 151.05(6)  |
| O(11)#5-Co(1)-O(3)#5 | 93.17(7)   | O(1)-Co(1)-O(4)#5     | 87.05(6)   |
| O(1)-Co(1)-O(3)#5    | 144.85(7)  | O(3)#5-Co(1)-O(4)#5   | 57.88(6)   |
| O(11)#5-Co(1)-N(4)#3 | 90.96(7)   | N(4)#3-Co(1)-O(4)#5   | 88.28(7)   |
| O(1)-Co(1)-N(4)#3    | 92.16(7)   | N(3)-Co(1)-O(4)#5     | 94.09(7)   |
| O(3)#5-Co(1)-N(4)#3  | 89.21(7)   | O(3)#5-Co(1)-N(3)     | 92.83(7)   |
| O(11)#5-Co(1)-N(3)   | 87.41(7)   | N(4)#3-Co(1)-N(3)     | 177.45(8)  |
| O(1)-Co(1)-N(3)      | 87.05(7)   | N(1)-Co(2)-O(9)       | 94.51(7)   |
| O(2)-Co(2)-O(10)#5   | 121.31(7)  | O(2)-Co(2)-N(1)       | 91.81(7)   |
| O(10)#5-Co(2)-N(1)   | 90.63(7)   | N(2)#3-Co(2)-O(9)     | 88.99(7)   |
| O(2)-Co(2)-N(2)#3    | 87.52(7)   | O(2)-Co(2)-O(8)       | 151.11(7)  |
| O(10)#5-Co(2)-N(2)#3 | 86.75(7)   | O(10)#5-Co(2)-O(8)    | 87.59(6)   |
| N(1)-Co(2)-N(2)#3    | 176.46(8)  | N(1)-Co(2)-O(8)       | 87.62(7)   |
| O(2)-Co(2)-O(9)      | 91.40(7)   | N(2)#3-Co(2)-O(8)     | 94.65(7)   |
| O(10)#5-Co(2)-O(9)   | 146.73(7)  | O(9)-Co(2)-O(8)       | 59.89(6)   |
| O(13)-Co(3)-O(13)#1  | 166.45(10) | N(5)-Co(3)-O(14)      | 83.91(5)   |
| O(13)-Co(3)-N(6)#2   | 96.78(5)   | O(13)-Co(3)-O(14)#1   | 117.23(7)  |
| O(13)#1-Co(3)-N(6)#2 | 96.78(5)   | O(13)#1-Co(3)-O(14)#1 | 61.14(7)   |
| O(13)-Co(3)-N(5)     | 83.22(5)   | N(6)#2-Co(3)-O(14)#1  | 96.09(5)   |
| O(13)#1-Co(3)-N(5)   | 83.22(5)   | N(5)-Co(3)-O(14)#1    | 83.91(5)   |
| N(6)#2-Co(3)-N(5)    | 180.000(2) | O(14)-Co(3)-O(14)#1   | 167.82(9)  |
| O(13)-Co(3)-O(14)    | 61.14(7)   | N(6)#2-Co(3)-O(14)    | 96.09(5)   |
| O(13)#1-Co(3)-O(14)  | 117.23(7)  |                       |            |
|                      |            | <b>Compound 6</b>     |            |
| O(8)-Co(1)           | 2.109(3)   | O(12)-Co(1)           | 2.077(3)   |
| O(14)-Co(1)          | 2.057(3)   | O(1)-Co(1)            | 2.036(3)   |
| Co(1)-O(6)#5         | 2.076(3)   | Co(1)-O(4)#3          | 2.103(3)   |
| N(1)-Co(2)           | 2.164(4)   | O(8)-Co(2)            | 2.086(3)   |
| O(13)-Co(2)          | 2.063(3)   | Co(2)-O(7)#5          | 2.047(3)   |
| Co(2)-N(4)#4         | 2.098(4)   |                       |            |
| N(3)-Co(3)           | 2.164(4)   | O(2)-Co(3)            | 2.074(3)   |
| Co(3)-O(4)#3         | 2.107(3)   | Co(3)-N(2)#2          | 2.111(4)   |
| Co(3)-O(3)#3         | 2.369(3)   | O(11)-Co(3)           | 2.033(3)   |
| O(1)-Co(1)-O(14)     | 177.38(13) | O(1)-Co(1)-O(12)      | 97.78(13)  |
| O(14)-Co(1)-O(12)    | 82.79(13)  | O(1)-Co(1)-O(6)#5     | 82.06(13)  |
| O(14)-Co(1)-O(6)#5   | 97.41(13)  | O(12)-Co(1)-O(6)#5    | 179.28(12) |
| O(1)-Co(1)-O(4)#3    | 89.19(12)  | O(14)-Co(1)-O(4)#3    | 93.36(13)  |
| O(12)-Co(1)-O(4)#3   | 90.67(12)  | O(6)#5-Co(1)-O(4)#3   | 88.62(12)  |
| O(1)-Co(1)-O(8)      | 90.58(12)  | O(14)-Co(1)-O(8)      | 86.84(12)  |
| O(12)-Co(1)-O(8)     | 92.20(12)  | O(6)#5-Co(1)-O(8)     | 88.47(12)  |
| O(4)#3-Co(1)-O(8)    | 177.09(13) |                       |            |
| O(7)#5-Co(2)-O(13)   | 95.73(14)  | O(8)-Co(2)-N(4)#4     | 151.79(14) |

---

---

|                     |            |                     |            |
|---------------------|------------|---------------------|------------|
| O(7)#5-Co(2)-O(8)   | 93.71(13)  | O(7)#5-Co(2)-N(1)   | 172.32(15) |
| O(13)-Co(2)-O(8)    | 111.43(13) | O(13)-Co(2)-N(1)    | 91.93(14)  |
| O(7)#5-Co(2)-N(4)#4 | 86.12(14)  | O(8)-Co(2)-N(1)     | 82.95(13)  |
| O(13)-Co(2)-N(4)#4  | 96.62(15)  | N(4)#4-Co(2)-N(1)   | 93.54(15)  |
| O(11)-Co(3)-O(2)    | 96.99(14)  | O(11)-Co(3)-O(4)#3  | 92.03(13)  |
| O(2)-Co(3)-O(4)#3   | 108.10(12) | O(11)-Co(3)-N(2)#2  | 85.42(14)  |
| O(2)-Co(3)-N(2)#2   | 90.26(14)  | O(4)#3-Co(3)-N(2)#2 | 161.64(14) |
| O(11)-Co(3)-N(3)    | 172.36(15) | O(4)#3-Co(3)-N(3)   | 85.20(13)  |
| O(2)-Co(3)-N(3)     | 90.64(14)  | N(2)#2-Co(3)-N(3)   | 94.97(15)  |
| O(11)-Co(3)-O(3)#3  | 89.04(13)  | O(2)-Co(3)-O(3)#3   | 165.14(12) |
| O(4)#3-Co(3)-O(3)#3 | 57.93(11)  | N(2)#2-Co(3)-O(3)#3 | 103.79(14) |
| N(3)-Co(3)-O(3)#3   | 83.46(13)  |                     |            |

---

Symmetry codes: Compound **1**: #4 = -x,-y,-z+1; #5 = x+1,y,z; #6 = -x,-y+1,-z+1; #7 = x+1,y-1,z;  
#8 = -x+1,-y,-z+1; #9 = x,y-1,z; **2**: #2 = -x+1,-y+1,-z; #3 = -x,-y+1,-z+1; #5 = -x+1,-y+2,-z+1; #6  
= x+1,y+1,z; **3**: #3 = x,y-1,z; #4 = x+1,y,z; #5 = -x,-y+1,-z; #6 = -x+1,-y+1,-z; **4**: #1 = -x,-y+2,-z;  
#2 = x,y,z-1; #3 = -x,-y+2,-z+1; #4 = x-1,y,z; #5 = -x+1,-y+2,-z; **5**: #1 = -x,y,-z+3/2; #2 = x,y+1,z;  
#3 = x,y-1,z; #5 = x,-y+1,z-1/2; **6**: #2 = -x,-y+1,-z+1; #3 = x+1,y,z; #4 = -x+1,-y+1,-z; #5 =  
-x,-y+1,-z.

**Table S2:** Hydrogen bonds (lengths and angles, Å and deg) for compounds **1-6**.

| D-H...A                | <i>d</i> (D-H) | <i>d</i> (H...A) | <i>d</i> (D...A) | ∠(DHA) |
|------------------------|----------------|------------------|------------------|--------|
| <b>Compound 1</b>      |                |                  |                  |        |
| O(1W)-H(1WA)...O(3)    | 0.87           | 2.06             | 2.851(5)         | 150.5  |
| O(1W)-H(1WB)...O(2W)#9 | 0.87           | 2.04             | 2.729(17)        | 135.8  |
| O(1W)-H(1WB)...O(5)#4  | 0.87           | 2.57             | 3.065(5)         | 117.4  |
| <b>Compound 2</b>      |                |                  |                  |        |
| O(8)-H(8)...O(1W)#5    | 0.870(17)      | 2.263(18)        | 3.094(3)         | 160(2) |
| O(1W)-H(1WB)...O(6)    | 0.87           | 1.97             | 2.816(3)         | 163.2  |
| <b>Compound 4</b>      |                |                  |                  |        |
| O(1W)-H(1WA)...O(2W)   | 0.89           | 1.92             | 2.771(5)         | 158.6  |
| O(1W)-H(1WB)...O(4)#9  | 0.89           | 1.77             | 2.664(4)         | 177.4  |
| O(2W)-H(2WA)...O(1)    | 0.87           | 2.63             | 3.231(5)         | 126.9  |
| O(2W)-H(2WB)...O(1W)#9 | 0.87           | 2.30             | 2.995(5)         | 136.7  |
| O(2W)-H(2WB)...O(1)#9  | 0.87           | 2.62             | 3.404(5)         | 151.2  |
| <b>Compound 5</b>      |                |                  |                  |        |
| O(7)-H(7)...O(13)#6    | 0.886(17)      | 1.711(17)        | 2.591(3)         | 172(3) |
| O(1W)-H(1WB)...O(9)    | 0.87           | 2.07             | 2.830(2)         | 145.4  |
| O(2W)-H(2WA)...O(3W)#7 | 0.84           | 1.91             | 2.751(5)         | 179.3  |
| O(2W)-H(2WB)...O(4)    | 0.84           | 2.18             | 3.026(3)         | 179.3  |
| O(3W)-H(3WA)...O(1W)   | 0.87           | 1.90             | 2.736            | 160.5  |
| O(3W)-H(3WB)...O(2W)   | 0.85           | 1.88             | 2.733            | 179.9  |
| <b>Compound 6</b>      |                |                  |                  |        |
| O(1W)-H(1WB)...O(7)    | 0.85           | 2.18             | 3.014(9)         | 169.0  |

Symmetry codes: Compound **1**: #4 = -x,-y,-z+1; #9 = x,y-1,z; Compound **2**: #5 = -x+1,-y+2,-z+1; Compound **4**: #9 = -x+1,-y+1,-z; Compound **5**: #6 = x+1/2,y-1/2,z; #7 = -x+1/2,-y+1/2,-z+1.

**Table S3:** The C<sub>phenyl</sub>-O-C<sub>phenyl</sub> bond angles and the dihedral angles between the phenyl rings in H<sub>3</sub>cpia ligand.

| Compound | C <sub>phenyl</sub> -O-C <sub>phenyl</sub> bond angle | dihedral angle between the phenyl rings |
|----------|-------------------------------------------------------|-----------------------------------------|
| <b>1</b> | 118.33°                                               | 80.48°                                  |
| <b>2</b> | 117.75°                                               | 65.38°                                  |
| <b>3</b> | 119.54°                                               | 76.80°                                  |
| <b>4</b> | 117.70°                                               | 81.54°                                  |
| <b>5</b> | 119.04° 116.39°                                       | 85.33° 63.66°                           |
| <b>6</b> | 119.21° 120.42°                                       | 61.78° 67.22°                           |
